# Supplementary material for: Rapid Clearing for High Resolution 3D Imaging of Ex Vivo Pancreatic Cancer Spheroids
Source: MDPI journal article supplement (doi:10.3390/ijms21207703), 2020-10-18
Supplement: s1 [file s1]

# Supplementary Materials

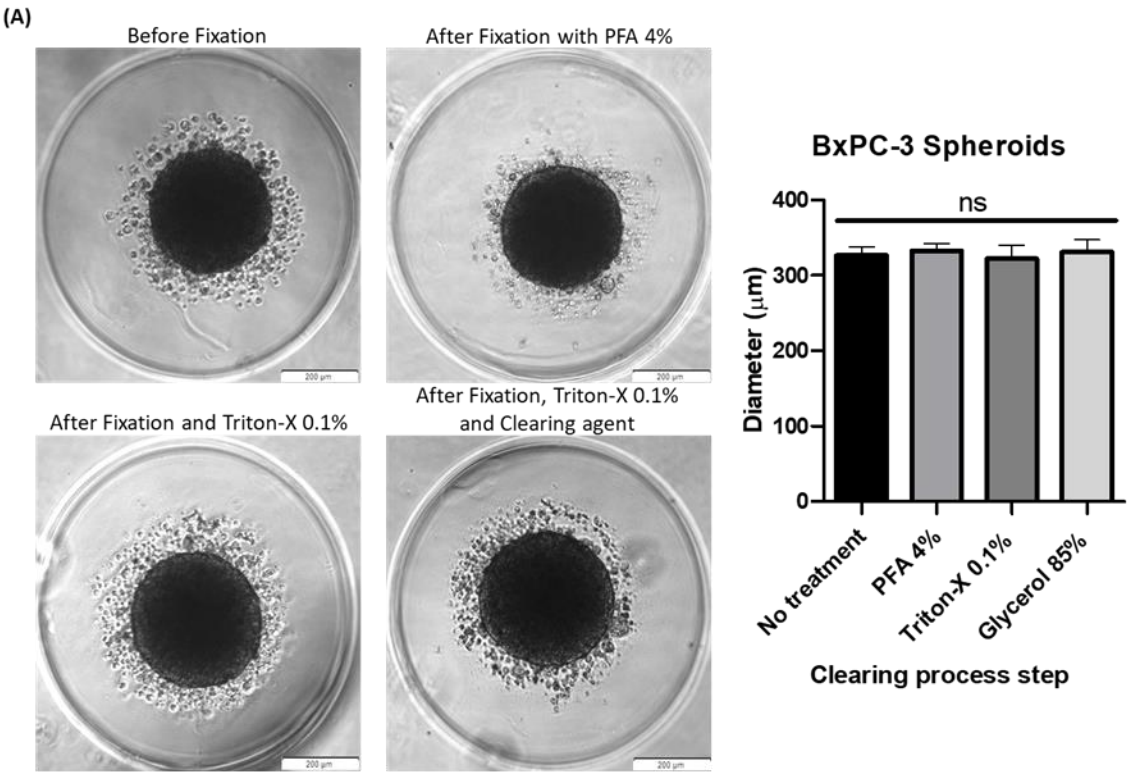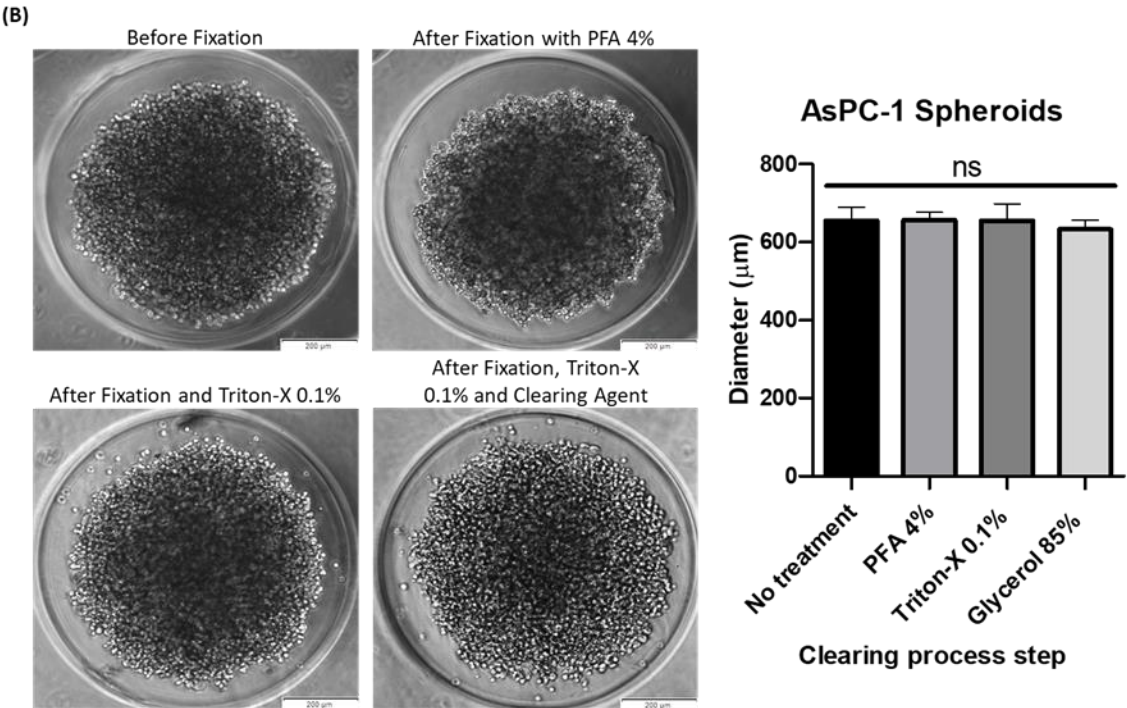

**Figure S1.** Comparing the size of BxPC-3 and AsPC-1 spheroids before and after each step of the clearing process. Light microscopy images of (A) BxPC-3 and (B) AsPC-1 spheroids taken before fixation, after fixation (with PFA 4%), following treatment with Triton-X 0.1% and after treatment with glycerin 85%. Results confirm the process had no effect on the spheroids' size. Radiuses were calculated using ImageJ and data was statistically analyzed using GraphPad Prism 8 (n=20-28).
